# Supplementary material for: ER stress increases expression of intracellular calcium channel RyR1 to modify Ca2+ homeostasis in pancreatic beta cells
Source: PubMed Central journal article supplement (PMC10448220; doi:10.1016/j.jbc.2023.105065), 2023-07-17
Supplement: mmc1.pdf [file mmc1.pdf]

### **Figure S1 High glucose increased *CHOP* expression**

INS-1 832/13 cells were cultured in control 11 mM glucose or high glucose (HG, 25 mM) for 16 hours. S1A: *CHOP*; S1B: *RyR1*; S1C: *RyR2*; S1D: *IP3R1* mRNA levels were measured. All values shown are means  $\pm$  SD, ##,  $p < 0.01$ ;  $n = 4$  independent experiments, by one sample t-test with hypothetical value set for 1.0.

### **Table 1 The list of materials**

### **Table 2 The list of qPCR primer sequences for rat**
