# Supplementary material for: ER stress increases expression of intracellular calcium channel RyR1 to modify Ca2+ homeostasis in pancreatic beta cells
Source: PubMed Central journal article supplement (PMC10448220; doi:10.1016/j.jbc.2023.105065), 2023-07-17
Supplement: mmc2.pdf [file mmc2.pdf]

**Table 1**

| <b>Materials</b>          | <b>Source</b>                   | <b>REF/CAT number</b> | <b>LOT number</b> |
|---------------------------|---------------------------------|-----------------------|-------------------|
| Tunicamycin               | Cayman chemical                 | 11445                 | 11089-65-9        |
| Cyclopiazonic acid        | Cayman chemical                 | 11326                 | 18172-33-3        |
| Thapsigargin              | Cayman chemical                 | 10522                 | 67526-95-8        |
| Sodium palmitate          | Millipore Sigma                 | P9767                 | 408-35-5          |
| BSA                       | Millipore Sigma                 | A1470                 | 9048-46-8         |
| Dantrolene                | Sigma-Aldrich                   | D9175                 | 066M4126V         |
| Xestospongine C           | Cayman chemical                 | 64950                 | 88903-69-9        |
| Ryanodine                 | Abcam                           | Ab120083              | APN14103-1-1      |
| DMSO                      | Sigma-Aldrich                   | 472301                | SHBK4364          |
| RNeasy mini kit           | Qiagen                          | 74104                 | 56905247          |
| SuperScript III           | Invitrogen                      | 11752                 | 2358356           |
| SYBR Green PCR master mix | Applied Biosystems              | 4367659               | 2203622           |
| RPMI 1640 medium          | Life technologies               | 11875-093             | 2339171           |
| Penicillin/streptomycin   | Life technologies               | 15140122              | N/A               |
| Sodium pyruvate           | Life technologies               | 11360-070             | 2428722           |
| Fetal bovine serum (FBS)  | R&D systems                     | S11150H               | B22030            |
| HEPES solution            | Life technologies               | 15630-080             | 1897332           |
| Lipofectamine RNAiMAX     | Invitrogen                      | 56532                 | 2373385           |
| DNase I                   | Invitrogen                      | 18068                 | 2245072           |
| Fura-2/AM                 | EMD Millipore                   | 344911                | 3732343           |
| NaCl                      | Sigma-Aldrich                   | S9888                 | SLCJ3968          |
| CaCl <sub>2</sub>         | Sigma-Aldrich                   | M9272                 | 021M0107V         |
| KCl                       | Sigma-Aldrich                   | P3911                 | SLBG1548V         |
| MgCl <sub>2</sub>         | Sigma-Aldrich                   | M9272                 | 021M0107V         |
| HEPES powder              | Sigma-Aldrich                   | H3375                 | SLCJ4491          |
| Glucose                   | Sigma-Aldrich                   | G8270                 | SLBP4805Vb        |
| EGTA                      | Sigma-Aldrich                   | E-4378                | 50H5624           |
| Diazoxide                 | Sigma-Aldrich                   | D9035                 | BCCB0466          |
| Propidium iodide          | Sigma-Aldrich                   | P4864                 | 25535-16-4        |
| Gibco PBS                 | Fisher scientific               | 20012-027             | 2362348           |
| UltraPure distilled water | Invitrogen by Life Technologies | 10977-015             | 2186770           |
