# Supplementary material for: ER stress increases expression of intracellular calcium channel RyR1 to modify Ca2+ homeostasis in pancreatic beta cells
Source: PubMed Central journal article supplement (PMC10448220; doi:10.1016/j.jbc.2023.105065), 2023-07-17
Supplement: mmc3.pdf [file mmc3.pdf]

Table 2

| Gene                | Forward                       | Reward                     |
|---------------------|-------------------------------|----------------------------|
| <i>RyR1</i>         | CGTAGACAACAACAGGGCAC          | AGATTTCTCCCACCATCCTGA      |
| <i>RyR2</i>         | ACGGCGACCATCCACAAAG           | AAAGTCTGTTGCCAAATCCTTCT    |
| <i>IP3R1</i>        | CAACCGTTACTATGGAAACATC        | TCAGCCAGGCTCATCTCAC        |
| <i>IP3R2</i>        | CGATGCCAGGATACGATGT           | CACCCTTGAAGTACCGATT        |
| <i>IP3R3</i>        | AGGAGCTGGTGGACGTGAT           | TGCTTGTTGTGCCTGGAAA        |
| <i>Hprt1</i>        | CTCATGGACTGATTATGGACAGGAC     | GCAGGTCAGCAAAGAAGCTTATAGCC |
| Spliced <i>Xbp1</i> | CTGAGTCCGAATCAGGTGCAG         | ATCCATGGGAAGATGTTCTGG      |
| Total <i>Xbp1</i>   | GAGCAGCAAGTGGTGGAT            | TCTCAATCACAAGCCCATG        |
| <i>ATF4</i>         | CCTGACTCTGCTGCTTATATTACTCTAAC | ACTCCAGGTGGGTCATAAGGTTTG   |
| <i>CHOP</i>         | CCAGCAGAGGTCACAAGCAC          | CGCACTGACCACTCTGTTTC       |
