# Supplementary material for: ER stress increases expression of intracellular calcium channel RyR1 to modify Ca2+ homeostasis in pancreatic beta cells
Source: PubMed Central journal article supplement (PMC10448220; doi:10.1016/j.jbc.2023.105065), 2023-07-17

Figure S1

A)

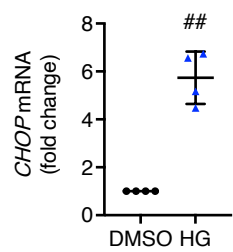

B)

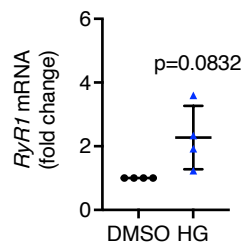

C)

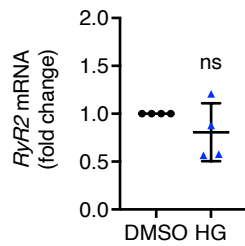

D)

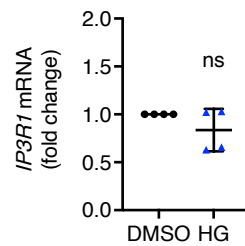

Supplement: mmc4.pdf [file mmc4.pdf]
